# Supplementary material for: Three-dimensional strain engineering in epitaxial vertically aligned nanocomposite thin films with tunable magnetotransport properties
Source: Royal Society of Chemistry journal article supplement (doi:10.1039/c8mh00216a), 2018-01-01
Supplement: c8mh00216a1.pdf [file c8mh00216a1.pdf]

## Electronic Supplementary Information

### **Three-dimensional strain engineering in epitaxial vertically aligned nanocomposite thin films with tunable magnetotransport properties**

*Xing Sun, Jijie Huang, Jie Jian, Meng Fan, Han Wang, Qiang Li, Judith L. MacManus-Driscoll, Ping Lu, Xinghang Zhang, and Haiyan Wang\**

X. Sun, J. Huang, J. Jian, M. Fan, H. Wang, Q. Li, Prof. X. Zhang, Prof. H. Wang  
School of Materials Engineering  
Purdue University  
West Lafayette, IN 47907, USA  
E-mail: hwang00@purdue.edu

Prof. J. L. MacManus-Driscoll  
Department of Materials Science and Metallurgy  
University of Cambridge  
Cambridge, CB3 0FS, U.K.

Prof. P. Lu  
Sandia National Laboratories  
Albuquerque, NM 87185, USA

Table S1. Synthesis condition for 3D framed thin films with pure CeO<sub>2</sub> as interlayer

| Sample NO. | LSMO-CeO <sub>2</sub> | CeO <sub>2</sub> | LSMO-CeO <sub>2</sub> | CeO <sub>2</sub> | LSMO-CeO <sub>2</sub> | CeO <sub>2</sub> | LSMO-CeO <sub>2</sub> |
|------------|-----------------------|------------------|-----------------------|------------------|-----------------------|------------------|-----------------------|
| C0         | 2400                  | 0                | 0                     | 0                | 0                     | 0                | 0                     |
| C1         | 1200                  | 120              | 1200                  | 0                | 0                     | 0                | 0                     |
| C2         | 800                   | 120              | 800                   | 120              | 800                   | 0                | 0                     |
| C3         | 600                   | 120              | 600                   | 120              | 600                   | 120              | 600                   |

Table S2. Synthesis condition for 3D framed thin films with pure LSMO as interlayer

| Sample NO. | LSMO-CeO <sub>2</sub> | LSMO | LSMO-CeO <sub>2</sub> | LSMO | LSMO-CeO <sub>2</sub> | LSMO | LSMO-CeO <sub>2</sub> |
|------------|-----------------------|------|-----------------------|------|-----------------------|------|-----------------------|
| L0         | 2400                  | 0    | 0                     | 0    | 0                     | 0    | 0                     |
| L1         | 1200                  | 120  | 1200                  | 0    | 0                     | 0    | 0                     |
| L2         | 800                   | 120  | 800                   | 120  | 800                   | 0    | 0                     |
| L3         | 600                   | 120  | 600                   | 120  | 600                   | 120  | 600                   |

Table S3. Out-of-plane d-spacing variation of 3D framed thin films with different CeO<sub>2</sub>

interlayers

| Sample name | CeO <sub>2</sub> (004) – Peak 1 | error    | CeO <sub>2</sub> (004) – Peak 2 | error    | LSMO (003) | error       |
|-------------|---------------------------------|----------|---------------------------------|----------|------------|-------------|
| C0          | 1.371875                        | 0.000575 | 1.371875                        | 0.000575 | 1.292525   | 0.000188746 |
| C1          | 1.376825                        | 0.000312 | 1.3688                          | 0.000187 | 1.290725   | 0.000271953 |
| C2          | 1.377825                        | 0.000239 | 1.364925                        | 0.000155 | 1.2889     | 0.000339116 |
| C3          | 1.385075                        | 0.000411 | 1.3631.4                        | 0.000351 | 1.28785    | 0.000490748 |

Table S4. Strain variation of sample C0-C3

| Sample name | Strain on CeO <sub>2</sub> (004) – peak 1/ (%) | Strain on CeO <sub>2</sub> (004) – peak 2/ (%) | Strain on LSMO (003)/ (%) |
|-------------|------------------------------------------------|------------------------------------------------|---------------------------|
| C0          | 0                                              | 0                                              | 0                         |
| C1          | 0.361                                          | -0.224                                         | -0.139                    |
| C2          | 0.434                                          | -0.507                                         | -0.280                    |
| C3          | 0.962                                          | -0.618                                         | -0.362                    |

Table S5. Out-of-plane d-spacing variation of 3D framed films L0-L3 with different LSMO interlayers

| Sample name | CeO <sub>2</sub> (004) | error      | LSMO (003) | error      |
|-------------|------------------------|------------|------------|------------|
| L0          | 1.37188                | 5.75E-4    | 1.29252    | 1.88746E-4 |
| L1          | 1.37090                | 3.80789E-4 | 1.29135    | 2.75379E-4 |
| L2          | 1.36975                | 3.22749E-4 | 1.29170    | 7.07107E-5 |
| L3          | 1.36853                | 4.97284E-4 | 1.29185    | 3.88909E-4 |

Table S6. Strain variation of sample L0-L3

|    | Strain on CeO <sub>2</sub> (004) / (%) | Strain on LSMO (003) / (%) |
|----|----------------------------------------|----------------------------|
| L0 | 0                                      | 0                          |
| L1 | -0.0711                                | -0.0909                    |
| L2 | -0.155                                 | -0.0638                    |
| L3 | -0.244                                 | -0.0522                    |

The  $d_{00l}$ -spacing is calculated according to the corresponding peak position and Bragg's law  $2d\sin\theta = n\lambda$ .

Each of nanocomposite thin film C0-C3 and L0-L3 was measured for three times to collect sufficient XRD  $2\theta$ - $\omega$  patterns for calculating the average of each  $d_{00l}$ -spacing and standard error listed in Table S3 and S5.

The out-of-plane (OP) strain  $\varepsilon_{OP}$  is calculated as follows:

$$\varepsilon_{OP}(\%) = \frac{d_{00l}(3D \text{ framed thin film}) - d_{00l}(\text{Single layer VAN thin film C0})}{d_{00l}(\text{Single layer VAN thin film C0})} \times 100$$

Here,  $d_{00l}(3D \text{ framed thin film})$  represents the d-spacing value of LSMO or CeO<sub>2</sub> phase in the 3D framed thin films C1-C3 and L1-L3;  $d_{00l}(\text{Single layer VAN thin film C0})$  is the d-spacing value of the single layer VAN thin film C0 or L0.

For example, the out-of-plane strain  $\varepsilon_{OP}$  of LSMO phase in sample C1 is calculated as:

$$\varepsilon_{OP}(\%) = \frac{d_{LSMO(003)}(C1) - d_{LSMO(003)}(C0)}{d_{LSMO(003)}(C0)} \times 100 = \frac{1.290725 - 1.292525}{1.292525} \times 100 \cong -0.139\%$$

The current in-plane lattice parameter  $a'$  or  $b'$  is calculated according to the out-of-plane lattice parameter  $c'$ :

$$a' = b' = \sqrt{\frac{V}{c'}} = \sqrt{\frac{a^3}{c'}}$$

Here  $V$  represents the volume of the unit cell, and  $a$  is the bulk lattice parameter (i.e.,  $a_{LSMO} = 3.870 \text{ \AA}$ ,  $a_{STO} = 3.905 \text{ \AA}$ ,  $a_{CeO_2} = 5.411 \text{ \AA}$ ).

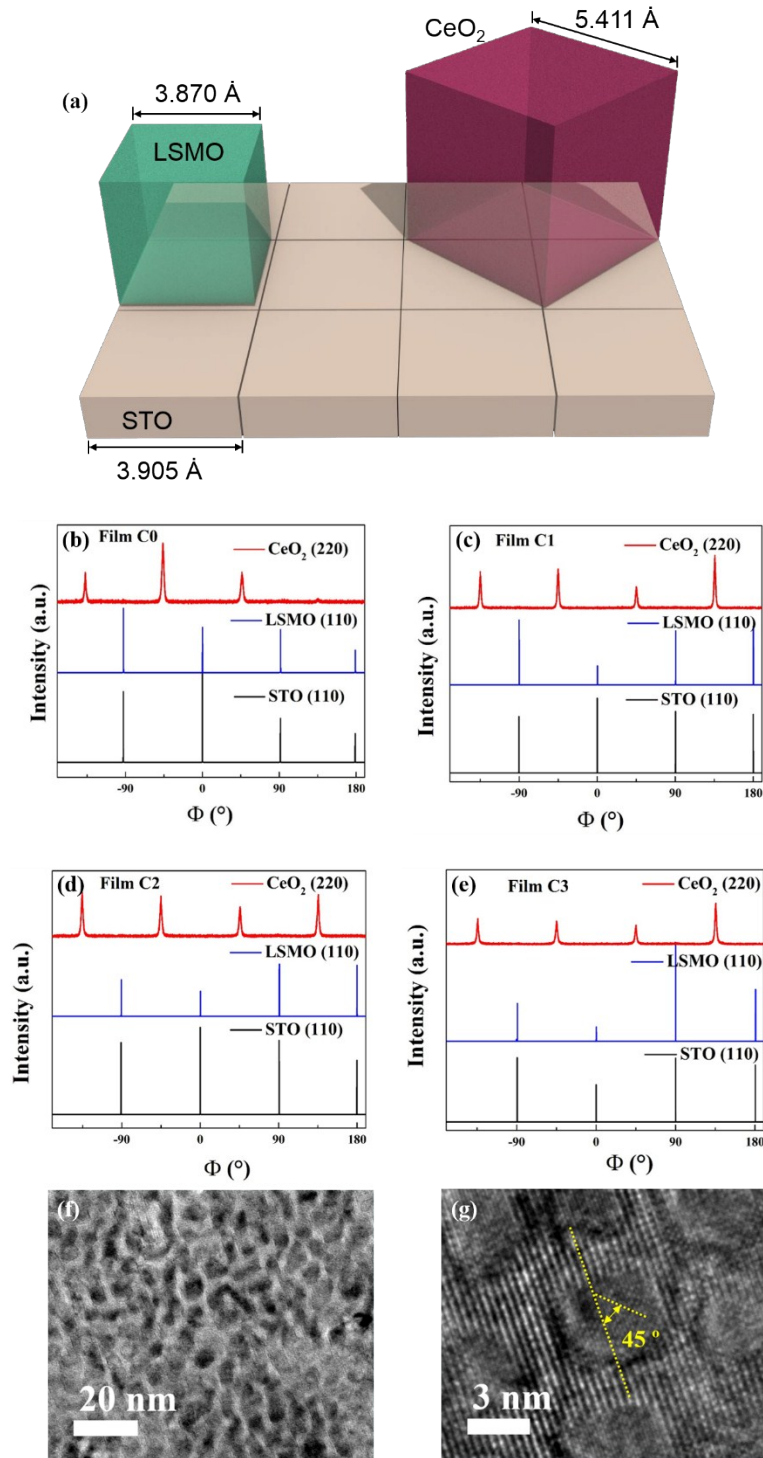

**Figure S1.** (a) Schematic illustration of in-plane lattice matching relations of STO(100) // CeO<sub>2</sub>(110) and STO(100) // LSMO(100).<sup>1-3</sup> (b-e)  $\phi$  scan patterns of sample C0-C3, and plan-view TEM images of sample C0 at (f) low and (g) high magnifications.

**Figure S1a** present the lattice matching relations between two film phases with substrate STO: CeO<sub>2</sub> is in a well in-plane lattice matching with STO substrate after 45° in-plane rotation; while LSMO was stacked on STO substrate in a cube-on-cube fashion without rotation. Those lattice matching relations of STO(100) // CeO<sub>2</sub>(110) and STO(100) // LSMO(100) are confirmed by  $\phi$  scan patterns of all 3D framed thin films C0-C3 in **Figure S1b-e**, respectively. Four-peak structure demonstrates the in-plane “cube-on-cube” stacking pattern of LSMO growing epitaxially on STO (001) substrate in all sample C0-C3. 45° in-plane rotation is determined to exist between CeO<sub>2</sub> and STO / LSMO from CeO<sub>2</sub>(220) // STO (110) and CeO<sub>2</sub>(220) // LSMO(110) in sample C0-C3. Non-equal intensity of the peaks in  $\phi$  scans suggests a difference between the in-plane *a*- and *b*- lattice parameters. Meanwhile, it is directly observed a 45° in-plane rotation between LSMO and CeO<sub>2</sub> phases in plan-view HRTEM of C0 (**Figure S1g**). Due to these lattice matching relations and the bulk lattice parameter relation of  $a_{CeO_2/\sqrt{2}} < a_{LSMO} < a_{STO}$  ( $a_{CeO_2/\sqrt{2}} = 3.826 \text{ \AA}$ ,  $a_{LSMO} = 3.870 \text{ \AA}$ ,  $a_{STO} = 3.905 \text{ \AA}$ ), the insertion of the lateral CeO<sub>2</sub> interlayers reduces the in-plane d-spacing and further increases out-of-plane d-spacing of the vertical CeO<sub>2</sub> nanopillars in the 3D interconnected CeO<sub>2</sub> frameworks. It explains the interesting phenomena that the *d*<sub>001</sub>-spacing of the vertical CeO<sub>2</sub> nanopillars is gradually exaggerated from C0 to C3 solely by insertion of lateral CeO<sub>2</sub> interlayers in Fig. 3d.<sup>1-3</sup>

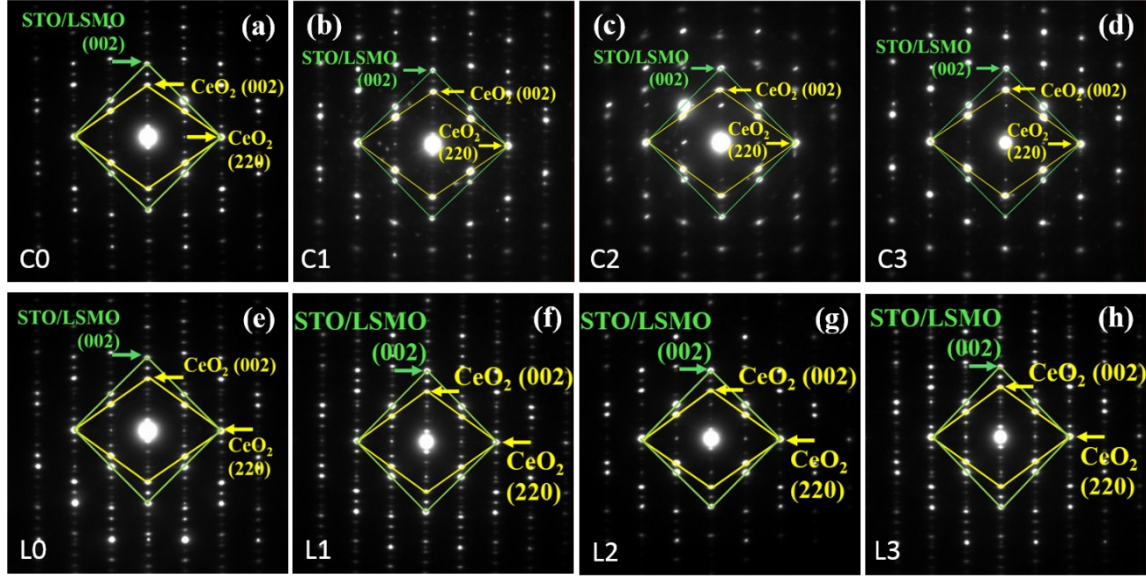

**Figure S2.** Cross-section selected-area electron diffraction (SAED) patterns of the 3D framed thin films with different interlayers: (a-d) C0-C3 embedding 0-3 horizontal CeO<sub>2</sub> interlayers and (e-h) L0-L3 with 0-3 LSMO interlayers, respectively. Those SAED patterns correspond to the cross-section TEM images in **Figure 2**.

High epitaxial growth quality in all as-prepared sample C0-C3 and L1-L3 is revealed from well-defined distinct diffraction dots in those selected area electron diffraction (SAED) patterns (**Figure S2**). No phase transition is observed in LSMO or CeO<sub>2</sub> phases during the strain modulation. Epitaxial correlations between films and substrates are confirmed to be CeO<sub>2</sub>(002) || LSMO(002) || STO(002) and CeO<sub>2</sub>[220] || LSMO[200] || STO[200]. The SAED results keep high consistence with XRD  $\phi$  scan data.



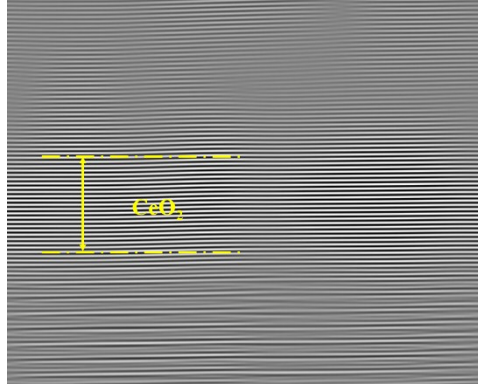

**Figure S3.** The fast-Fourier filtered image of **Figure 4b**.

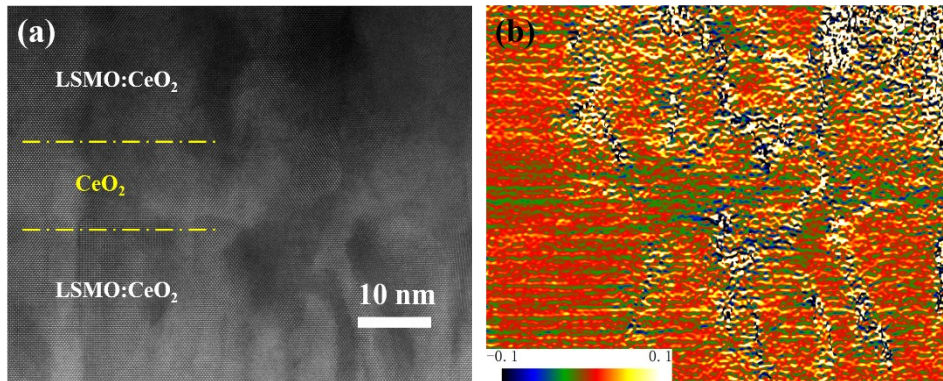

**Figure S4.** (a) HRSTEM image of C3 at the second CeO<sub>2</sub> interlayer (marked as 2 in Figure 4d), and (b) its corresponding GPA  $\epsilon_{yy}$  (out-of-plane strain) map.

**Figure S4a** shows HRSTEM image of the second lateral CeO<sub>2</sub> interlayer of sample C3, corresponding to the area marked as 2 in **Figure 4d**. As mentioned before, 45° in-plane rotation interrupts the ordered arrangement in nanocomposite films. Strain distribution around this second lateral CeO<sub>2</sub> interlayer is also influenced and not well-defined.

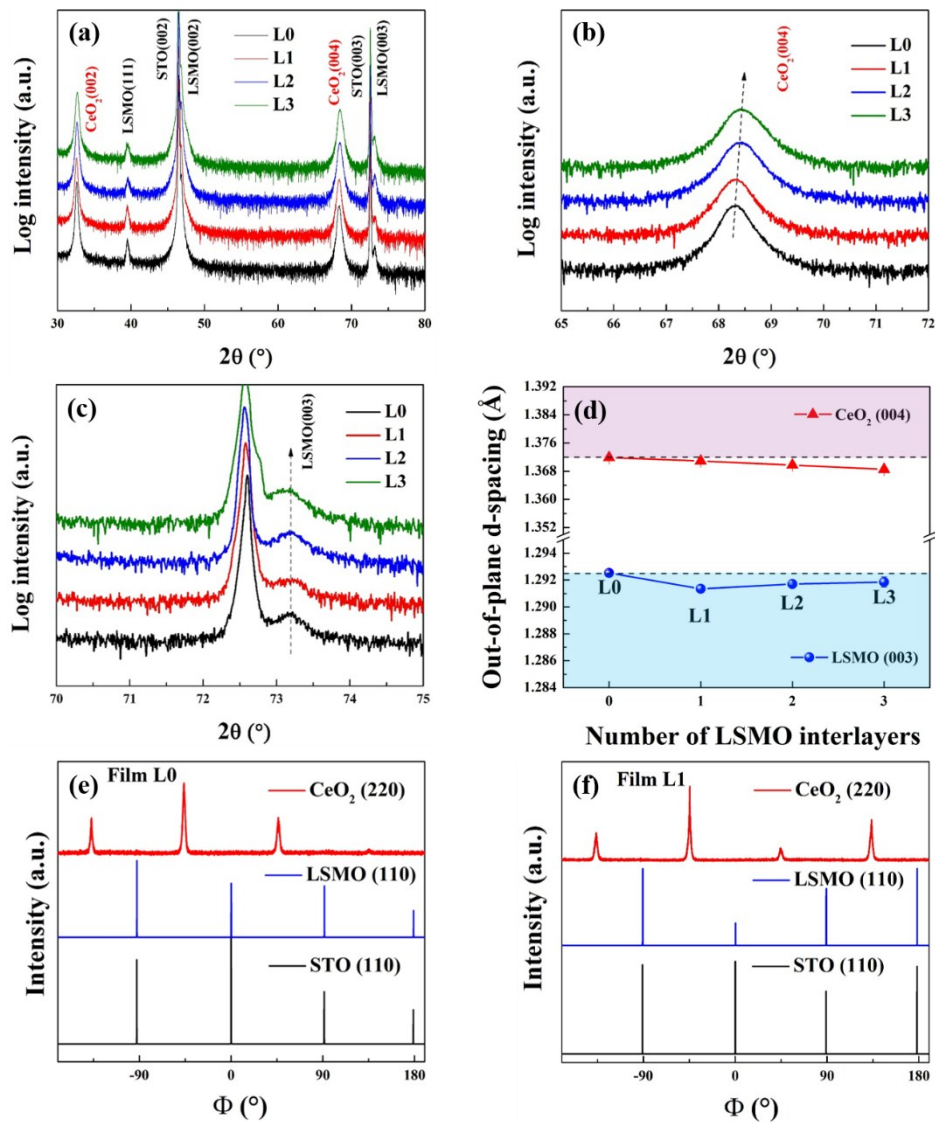

**Figure S5.** (a) XRD  $2\theta$ - $\omega$  patterns of the VAN thin film L0 and the 3D LSMO framed thin films L1-L3. (b) Local  $\text{CeO}_2(004)$   $2\theta$ - $\omega$  scans of the VAN thin film L0 and the 3D LSMO framed thin films L1-L3. (c) Local LSMO(003)  $2\theta$ - $\omega$  scans of the VAN thin film L0 and the 3D LSMO framed thin films L1-L3. (d) Systematic tuning out-of-plane d-spacing of  $\text{CeO}_2(004)$  and LSMO(003) by 3D structure engineering in L0-L3 (the error bars are shown according to Table S5). The pink region on the top represents out-of-plane tensile strain area of  $\text{CeO}_2$  phase and blue region on the

bottom represents out-of-plane compressive strain area of LSMO phase, compared to sample L0.  $\phi$  scan patterns of (e) L0 and (f) L1 films along (110) direction.

The 3D LSMO frameworks are constructed in Samples L1-L3 by inserting 1-3 lateral LSMO interlayers into the LSMO-CeO<sub>2</sub> VAN thin film L0 as shown in Fig. 1 and 2. Similarly, XRD 2 $\theta$ - $\omega$  patterns in Fig. S5a demonstrate that all the thin films L0-L3 grow highly textured along (001) direction on STO (001) substrates. LSMO and CeO<sub>2</sub> grow separately without apparent intermixing in the thin films L0-L3. With the increasing number of the lateral LSMO interlayers, CeO<sub>2</sub> (004) peaks gradually shift to higher angles (Fig. S5b), implying the slightly reduced  $d_{\text{CeO}_2(004)}$ -spacing from L0 to L3. The LSMO (003) peaks in L0-L3 remain relatively constant as the lateral LSMO interlayers increase (Fig. S5c), revealing similar  $d_{\text{LSMO}(003)}$ -spacing in L0-L3. According to Table S5, the out-of-plane d-spacing variations of CeO<sub>2</sub> (004) and LSMO (003) in L0-L3 are plotted in Fig. S5d. Compared to sample C0, the CeO<sub>2</sub> vertical nanopillars are under minor compressive strain out-of-plane in L1-L3 under the effects of the 3D LSMO frameworks. The out-of-plane d-spacing of LSMO matrix basically remains the same. Therefore, the strain tunability out-of-plane is dominated by the 3D interconnected LSMO frames in L1-L3 with minimal impacts on the out-of-plane strain coupling between LSMO matrix and CeO<sub>2</sub> vertical nanopillars.

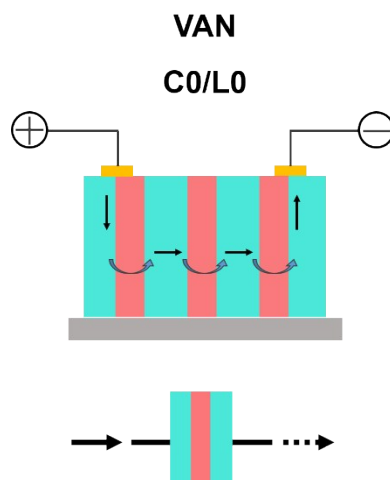

**Figure S6.** Schematic illustration of circuit model for VAN structured C0 without lateral CeO<sub>2</sub> interlayer.

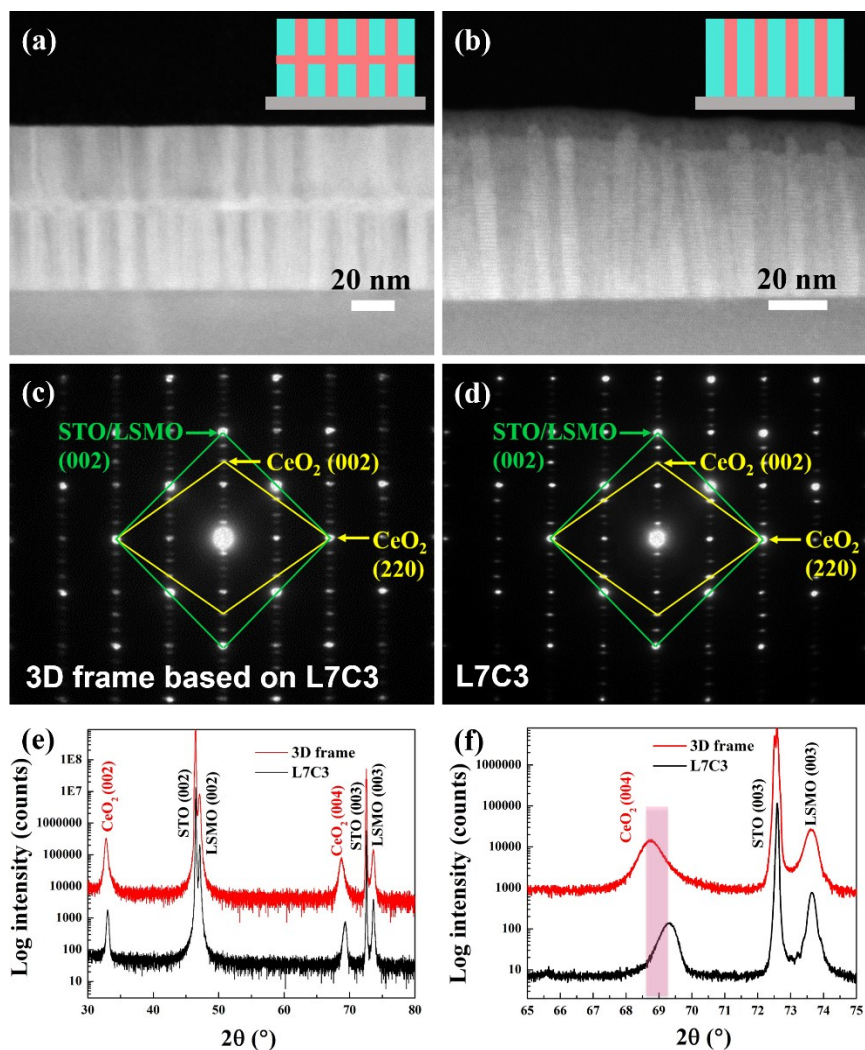

**Figure S7.** Cross-sectional STEM images of (a) the 3D CeO<sub>2</sub> framed thin film with L7C3 (molar ratio of LSMO:CeO<sub>2</sub> = 7:3) VAN and (b) the L7C3 VAN thin film. The corresponding SAED patterns of (c) the 3D CeO<sub>2</sub> framed thin film and (d) the L7C3 thin film. (e) XRD 2θ-ω patterns of the L7C3 and its 3D CeO<sub>2</sub> framed thin films. (f) Local 2θ-ω scans of these two thin films at CeO<sub>2</sub> (004) and LSMO/STO (003) diffractions (the red band is used to mark the peak shift of CeO<sub>2</sub> (004) diffraction between the single layer L7C3 and the 3D framed film).

## References

1. A. P. Chen, Z. X. Bi, H. Hazariwala, X. H. Zhang, Q. Su, L. Chen, Q. X. Jia, J. L. MacManus-Driscoll and H. Y. Wang, *Nanotechnology*, 2011, **22**, 6.
2. M. Fan, W. Zhang, F. Khatkhatay, L. Li and H. Wang, *J. Appl. Phys.*, 2015, **118**, 065302.
3. A. P. Chen, Z. X. Bi, Q. X. Jia, J. L. MacManus-Driscoll and H. Y. Wang, *Acta Mater.*, 2013, **61**, 2783-2792.
